# Supplementary material
Source: publisher figshare collection journal article supplement (https://frontiersin.figshare.com/ndownloader/files/34874763)
Supplement: Supplementary file 1 [file 34874763]

Supplementary Material

**Supplementary Table 1.** Detailed information of collection date, total mass flux, total carbon, organic carbon, and total nitrogen in sinking particles collected at 1000 m.

| No. | Open date | Close date | Total  mass flux  (mg/m3/day) | Lithogenic  flux  (mg/m3/day) | Total  carbon  (%) | Organic  carbon  (%) | Total  nitrogen  (%) | THAA flux  (mg/m3/day) | THAA-N/TN  (%) |
| --- | --- | --- | --- | --- | --- | --- | --- | --- | --- |
| 1 | 07/23/2017 | 07/08/2017 | 171.1 | 29.1 | 12.41 | 11.29 | 2.23 | 2.05 | 6.74 |
| 2 | 07/08/2017 | 22/08/2017 | 144.1 | 24.7 | 13.32 | 13.13 | 1.59 | 1.42 | 7.73 |
| 3 | 22/08/2017 | 06/09/2017 | 118.3 | 14.3 | 11.81 | 11.21 | 1.45 | 2.23 | 16.12 |
| 4 | 06/09/2017 | 21/09/2017 | 205.8 | 32.7 | 12.58 | 11.64 | 1.48 | 1.94 | 7.96 |
| 5 | 21/09/2017 | 06/10/2017 | 186.9 | 41.4 | 11.06 | 9.89 | 1.71 | 2.31 | 9.01 |
| 6 | 06/10/2017 | 21/10/2017 | 187.4 | 42.1 | 10.29 | 9.05 | 1.65 | 1.85 | 7.45 |
| 7 | 21/10/2017 | 05/11/2017 | 338.6 | 52.4 | 9.39 | 8.39 | 1.98 | 3.51 | 6.55 |
| 8 | 05/11/2017 | 20/11/2017 | 332.0 | 60.9 | 10.45 | 8.43 | 2.15 | 4.09 | 7.22 |
| 9 | 20/11/2017 | 05/12/2017 | 227.8 | 39.0 | 11.23 | 8.86 | 2.15 | 1.64 | 4.20 |
| 10 | 05/12/2017 | 20/12/2017 | 280.5 | 56.2 | 9.86 | 8.22 | 1.43 | 2.89 | 8.96 |
| 11 | 20/12/2017 | 04/01/2017 | 245.5 | 58.8 | 8.44 | 7.09 | 1.26 | 1.91 | 7.70 |
| 12 | 04/01/2017 | 19/01/2017 | 168.0 | 53.2 | 8.49 | 7.19 | 0.92 | 1.13 | 9.14 |
| 13 | 19/01/2017 | 03/02/2017 | 263.2 | 85.1 | 7.27 | 6.19 | 1.05 | 1.63 | 7.39 |
| 14 | 03/02/2017 | 18/02/2017 | 266.8 | 62.8 | 6.74 | 5.90 | 0.96 | 1.46 | 7.11 |
| 15 | 18/02/2017 | 05/03/2017 | 279.8 | 57.1 | 5.94 | 5.06 | 0.71 | 0.87 | 5.46 |
| 16 | 05/03/2017 | 20/03/2017 | 121.2 | 33.7 | 5.89 | 4.87 | 0.81 | 0.52 | 6.62 |
| 17 | 20/03/2017 | 04/04/2017 | 197.9 | 32.7 | 5.93 | 5.25 | 0.58 | 0.82 | 8.89 |

**Supplementary Table 2.** Detailed information of collection date, total mass flux, total carbon, organic carbon, and total nitrogen contents in sinking particles collected at collected at 2250 m.

| No. | Open date | Close date | Total  mass flux  (mg/m3/day) | Lithogenic  flux  (mg/m3/day) | Total  carbon  (%) | Organic  carbon  (%) | Total  nitrogen  (%) | THAA flux (mg/m3/day) | THAA-N/TN  (%) |
| --- | --- | --- | --- | --- | --- | --- | --- | --- | --- |
| 1 | 07/23/2017 | 07/08/2017 | 149.7 | 45.7 | 7.76 | 6.90 | 0.59 | 1.00 | 13.69 |
| 2 | 07/08/2017 | 22/08/2017 | 182.4 | 47.0 | 7.42 | 6.71 | 0.54 | 1.23 | 15.14 |
| 3 | 22/08/2017 | 06/09/2017 | 198.2 | 47.2 | 7.79 | 7.33 | 0.70 | 1.54 | 13.40 |
| 4 | 06/09/2017 | 21/09/2017 | 205.9 | 51.3 | 8.46 | 7.94 | 0.98 | 3.21 | 19.26 |
| 5 | 21/09/2017 | 06/10/2017 | 218.9 | 74.3 | 8.37 | 7.55 | 0.99 | 1.96 | 10.84 |
| 6 | 06/10/2017 | 21/10/2017 | 187.2 | 43.6 | 7.02 | 6.80 | 0.84 | 1.60 | 12.25 |
| 7 | 21/10/2017 | 05/11/2017 | 251.3 | 58.2 | 7.43 | 6.57 | 1.16 | 4.23 | 17.71 |
| 8 | 05/11/2017 | 20/11/2017 | 355.5 | 82.7 | 7.33 | 6.39 | 1.10 | 1.83 | 5.63 |
| 9 | 20/11/2017 | 05/12/2017 | 340.7 | 74.8 | 7.89 | 6.43 | 1.19 | 5.44 | 16.49 |
| 10 | 05/12/2017 | 20/12/2017 | 328.3 | 103.0 | 7.57 | 6.33 | 0.86 | 2.48 | 10.85 |
| 11 | 20/12/2017 | 04/01/2017 | 351.8 | 95.2 | 7.05 | 6.09 | 0.89 | 4.78 | 18.82 |
| 12 | 04/01/2017 | 19/01/2017 | 276.7 | 89.0 | 7.00 | 6.14 | 0.88 | 2.59 | 13.08 |
| 13 | 19/01/2017 | 03/02/2017 | 353.2 | 109.9 | 6.53 | 5.58 | 1.09 | 3.87 | 12.30 |
| 14 | 03/02/2017 | 18/02/2017 | 494.1 | 144.2 | 6.14 | 5.40 | 1.21 | 6.00 | 12.45 |
| 15 | 18/02/2017 | 05/03/2017 | 430.9 | 134.5 | 5.13 | 4.04 | 0.91 | 4.59 | 14.50 |
| 16 | 05/03/2017 | 20/03/2017 | 373.0 | 111.6 | 5.67 | 4.76 | 0.59 | 2.65 | 14.65 |
| 17 | 20/03/2017 | 04/04/2017 | 340.4 | 90.4 | 5.75 | 4.86 | 0.84 | 3.47 | 14.76 |

**Supplementary Table 3.** Molar percent (%) of amino acids and degradation index in sinking particles collected at 1000 m.

| No. | Ala | Gly | BALA | Val | Leu | Ile | GABA | Pro | Asp | Thr | Ser | Met | Glu | Phe | Lys | DI |
| --- | --- | --- | --- | --- | --- | --- | --- | --- | --- | --- | --- | --- | --- | --- | --- | --- |
| 1 | 12.6 | 15.0 | 0.9 | 7.2 | 8.7 | 7.6 | 0.8 | 6.4 | 9.2 | 4.6 | 3.8 | 1.3 | 12.4 | 3.8 | 5.6 | 0.83 |
| 2 | 11.8 | 14.6 | 1.0 | 7.0 | 9.1 | 8.4 | 0.7 | 6.3 | 10.7 | 2.3 | 2.8 | 1.2 | 12.9 | 4.8 | 6.3 | 0.71 |
| 3 | 12.0 | 15.3 | 0.8 | 7.4 | 8.4 | 7.0 | 0.6 | 6.1 | 10.7 | 5.3 | 5.1 | 1.1 | 11.7 | 4.1 | 4.2 | 0.69 |
| 4 | 13.1 | 15.7 | 1.2 | 6.5 | 8.7 | 8.3 | 0.9 | 5.1 | 9.4 | 3.8 | 3.6 | 1.4 | 13.1 | 4.3 | 4.9 | 0.91 |
| 5 | 12.7 | 15.6 | 1.0 | 6.8 | 8.7 | 7.9 | 0.7 | 5.6 | 9.5 | 4.2 | 3.7 | 1.2 | 12.9 | 4.2 | 5.1 | 0.85 |
| 6 | 12.9 | 15.5 | 1.2 | 6.6 | 9.2 | 8.7 | 0.8 | 4.8 | 9.4 | 3.6 | 3.1 | 1.2 | 13.7 | 4.5 | 4.8 | 1.01 |
| 7 | 12.6 | 16.3 | 1.1 | 6.3 | 8.7 | 8.3 | 0.9 | 4.9 | 10.0 | 3.7 | 3.1 | 1.6 | 12.7 | 4.5 | 5.2 | 0.84 |
| 8 | 11.7 | 15.3 | 1.5 | 6.9 | 8.3 | 7.6 | 0.9 | 5.6 | 10.6 | 4.0 | 3.4 | 1.7 | 12.2 | 4.1 | 6.2 | 0.55 |
| 9 | 14.0 | 14.8 | 1.3 | 6.7 | 9.8 | 10.0 | 0.6 | 4.5 | 7.5 | 3.5 | 4.6 | 1.7 | 11.4 | 4.6 | 5.1 | 1.52 |
| 10 | 12.3 | 16.6 | 1.5 | 6.0 | 8.1 | 8.0 | 1.2 | 4.5 | 11.1 | 3.4 | 4.0 | 1.8 | 12.9 | 4.1 | 4.5 | 0.56 |
| 11 | 12.8 | 15.9 | 1.7 | 5.6 | 8.7 | 9.2 | 1.3 | 4.3 | 9.7 | 2.8 | 3.2 | 1.5 | 13.5 | 4.6 | 5.3 | 0.87 |
| 12 | 12.5 | 15.5 | 1.9 | 4.9 | 8.9 | 9.7 | 1.2 | 4.0 | 9.4 | 2.8 | 2.9 | 1.6 | 13.8 | 4.9 | 6.0 | 0.96 |
| 13 | 12.9 | 16.0 | 2.2 | 5.3 | 8.1 | 8.4 | 1.3 | 4.6 | 9.9 | 3.9 | 4.4 | 1.6 | 12.5 | 4.5 | 4.6 | 0.76 |
| 14 | 12.6 | 15.2 | 2.3 | 4.3 | 9.3 | 10.3 | 0.8 | 3.4 | 8.6 | 3.3 | 4.0 | 1.7 | 13.5 | 5.3 | 5.4 | 1.25 |
| 15 | 10.3 | 12.7 | 2.8 | 2.3 | 9.1 | 11.3 | 1.1 | 1.7 | 6.4 | 7.4 | 8.1 | 2.4 | 12.2 | 5.3 | 6.9 | 1.66 |
| 16 | 12.1 | 13.5 | 2.4 | 2.8 | 10.3 | 12.6 | 0.8 | 2.3 | 6.2 | 2.6 | 3.2 | 2.5 | 14.6 | 6.2 | 7.6 | 1.82 |
| 17 | 12.3 | 14.0 | 1.8 | 4.3 | 10.1 | 11.1 | 0.7 | 4.5 | 7.7 | 1.3 | 2.2 | 2.4 | 14.5 | 5.9 | 7.2 | 1.44 |

**Supplementary Table 4.** Molar percent (%) of amino acids and degradation index in sinking particles collected at 2250 m.

| No. | Ala | Gly | BALA | Val | Leu | Ile | GABA | Pro | Asp | Thr | Ser | Met | Glu | Phe | Lys | DI |
| --- | --- | --- | --- | --- | --- | --- | --- | --- | --- | --- | --- | --- | --- | --- | --- | --- |
| 1 | 6.4 | 8.9 | 2.6 | 7.3 | 6.9 | 4.2 | 2.8 | 9.8 | 13.0 | 6.2 | 7.9 | 2.5 | 12.6 | 4.1 | 5.0 | -0.34 |
| 2 | 7.2 | 9.4 | 2.5 | 7.5 | 7.1 | 4.0 | 3.0 | 11.4 | 12.4 | 6.0 | 7.0 | 2.3 | 13.0 | 3.8 | 3.4 | -0.34 |
| 3 | 6.6 | 8.8 | 2.2 | 6.8 | 7.1 | 3.5 | 2.6 | 10.9 | 13.0 | 6.7 | 8.6 | 2.4 | 12.4 | 4.0 | 4.4 | -0.38 |
| 4 | 7.6 | 10.0 | 2.3 | 6.2 | 7.3 | 3.3 | 2.3 | 11.0 | 13.2 | 5.9 | 8.5 | 2.0 | 12.7 | 4.1 | 3.6 | -0.46 |
| 5 | 7.5 | 8.6 | 2.2 | 9.0 | 8.2 | 4.8 | 2.2 | 12.5 | 10.4 | 6.1 | 6.7 | 2.1 | 11.8 | 4.5 | 3.5 | 0.22 |
| 6 | 7.1 | 10.8 | 2.4 | 6.4 | 6.1 | 3.1 | 2.0 | 4.8 | 13.6 | 11.9 | 12.9 | 1.5 | 12.0 | 4.0 | 1.6 | -0.02 |
| 7 | 6.8 | 9.4 | 2.1 | 6.5 | 6.8 | 3.4 | 2.2 | 10.6 | 12.0 | 7.9 | 10.9 | 1.5 | 11.7 | 3.6 | 4.5 | -0.32 |
| 8 | 7.2 | 9.9 | 2.7 | 8.0 | 7.4 | 4.5 | 2.8 | 11.5 | 9.2 | 7.1 | 8.5 | 2.6 | 11.5 | 5.0 | 2.1 | 0.31 |
| 9 | 7.1 | 10.0 | 2.3 | 5.7 | 6.7 | 2.9 | 2.3 | 10.6 | 12.9 | 7.3 | 10.9 | 1.8 | 11.6 | 3.7 | 4.1 | -0.52 |
| 10 | 8.2 | 11.6 | 3.5 | 4.9 | 6.4 | 2.5 | 3.2 | 11.6 | 12.3 | 5.2 | 8.7 | 2.2 | 12.0 | 4.0 | 3.6 | -0.77 |
| 11 | 6.9 | 9.6 | 2.4 | 6.8 | 6.6 | 3.7 | 2.1 | 9.3 | 11.6 | 8.2 | 11.3 | 1.0 | 11.6 | 3.5 | 5.3 | -0.25 |
| 12 | 7.3 | 9.8 | 2.9 | 6.2 | 7.2 | 4.2 | 2.4 | 9.9 | 12.1 | 7.0 | 9.2 | 1.7 | 11.8 | 4.0 | 4.3 | -0.24 |
| 13 | 7.3 | 9.9 | 2.9 | 5.7 | 6.6 | 3.1 | 2.4 | 9.4 | 12.2 | 8.1 | 11.9 | 1.6 | 11.4 | 3.6 | 4.0 | -0.39 |
| 14 | 7.5 | 10.0 | 3.1 | 5.2 | 6.6 | 2.8 | 2.1 | 9.5 | 12.2 | 8.0 | 12.1 | 1.4 | 11.6 | 3.4 | 4.5 | -0.51 |
| 15 | 7.2 | 9.9 | 3.4 | 4.9 | 6.5 | 2.7 | 2.5 | 9.9 | 11.9 | 7.9 | 12.3 | 1.5 | 11.5 | 3.6 | 4.4 | -0.56 |
| 16 | 7.3 | 10.6 | 4.1 | 6.4 | 6.3 | 3.8 | 3.0 | 9.8 | 14.0 | 5.9 | 7.1 | 1.5 | 12.7 | 3.9 | 3.6 | -0.75 |
| 17 | 7.1 | 9.1 | 2.4 | 6.1 | 7.7 | 3.5 | 2.2 | 9.4 | 13.6 | 6.5 | 10.2 | 1.4 | 12.6 | 4.0 | 4.4 | -0.44 |

**Supplementary Table 5.** Bulk and Amino acid nitrogen isotope ratios, ΣV values (‰), and trophic position in sinking particles collected at 1000 m.

| No. | Bulk | Trophic AAs | | | | | | Source AAs | | THAA | ΣV | TP |
| --- | --- | --- | --- | --- | --- | --- | --- | --- | --- | --- | --- | --- |
| Ala | Val | Leu | Ile | Pro | Glu | Gly | Phe |
| 1 | 1.7 | 13.9±1.1 | 14.5±0.2 | 12.7±0.7 | 13.1±0.7 | 13.6±0.7 | 16.6±0.6 | -0.6±1.3 | 0.5±1.0 | 7.8 | 1.0 | 2.7±0.3 |
| 2 | 3.9 | 9.6±0.9 | 15.5±0.5 | 11.9±0.6 | 14.5±0.9 | 11.6±0.9 | 17.6±0.8 | 0.7±0.7 | 2.6±0.5 | 7.7 | 2.4 | 2.5±0.3 |
| 3 | 3.9 | 10.8±1.2 | 19.7±1.4 | 12.9±0.7 | 13.4±0.7 | 11.5±0.4 | 14.6±1.6 | 0.9±1.2 | 2.2±0.2 | 7.4 | 2.2 | 2.2±0.3 |
| 4 | 4.2 | 10.2±0.7 | 15.9±1.1 | 14.3±0.8 | 14.4±0.5 | 12.7±0.7 | 17.1±0.7 | 0.4±0.0 | -1.1±1.1 | 7.7 | 1.8 | 2.9±0.4 |
| 5 | 5.1 | 12.9±0.7 | 15.8±1.3 | 14.2±0.5 | 15.4±0.6 | 12.2±0.2 | 15.3±0.9 | 0.7±0.2 | 3.5±0.1 | 8.1 | 1.2 | 2.1±0.3 |
| 6 | 5.6 | 12.7±0.7 | 14.0±0.6 | 14.4±0.1 | 14.6±0.6 | 14.2±0.6 | 15.8±1.0 | -0.6±0.0 | 2.2±0.5 | 8.0 | 0.6 | 2.3±0.3 |
| 7 | 5.3 | 13.8±0.3 | 18.4±0.8 | 12.5±1.0 | 10.8±0.4 | 13.0±0.1 | 15.6±0.8 | 2.3±1.0 | 3.8±0.3 | 8.1 | 2.0 | 2.1±0.2 |
| 8 | 4.4 | 10.4±0.5 | 16.3±1.2 | 12.6±0.3 | 13.6±0.1 | 11.8±0.3 | 14.5±1.1 | -0.1±1.3 | 1.2±0.6 | 6.9 | 1.6 | 2.3±0.3 |
| 9 | 4.7 | 10.4±0.6 | 14.1±1.4 | 11.1±0.0 | 14.8±0.1 | 11.8±0.9 | 17.2±0.9 | 1.4±0.3 | 2.9±0.0 | 7.8 | 2.2 | 2.4±0.3 |
| 10 | 3.2 | 9.7±0.3 | 14.5±1.5 | 12.4±0.3 | 14.0±0.3 | 10.9±0.1 | 17.0±0.1 | 1.2±0.4 | 2.5±0.5 | 7.2 | 2.1 | 2.5±0.3 |
| 11 | 3.8 | 10.6±1.6 | 14.1±1.2 | 12.4±0.2 | 13.6±1.5 | 11.9±1.4 | 16.8±1.1 | 2.4±0.6 | 2.6±0.3 | 7.8 | 1.6 | 2.4±0.3 |
| 12 | 0.8 | 9.4±0.6 | 14.3±1.8 | 8.9±0.6 | 12.0±0.2 | 10.8±1.0 | 16.0±0.8 | 2.0±0.5 | 2.1±0.7 | 6.9 | 2.2 | 2.4±0.3 |
| 13 | -0.3 | 6.4±0.8 | 11.1±1.2 | 6.3±0.2 | 7.6±0.6 | 8.3±0.4 | 12.1±0.8 | -0.2±1.2 | 0.0±0.5 | 4.4 | 2.0 | 2.1±0.3 |
| 14 | -3.4 | 6.1±1.7 | 9.8±1.0 | 4.1±0.5 | 5.2±0.9 | 7.3±0.6 | 11.3±0.6 | 0.4±0.1 | 0.0±0.5 | 4.0 | 2.2 | 2.0±0.2 |
| 15 | -0.1 |  |  |  |  |  |  |  |  |  |  |  |
| 16 |  | 7.0±1.3 | 6.8±0.9 | nd | nd | 5.3±1.9 | 8.3±1.0 | -1.9±1.7 | -1.3±0.2 | 2.1 |  | 1.8±0.2 |
| 17 | -0.9 | 3.3±1.3 | 8.6±1.0 | 0.4±0.4 | 2.5±0.3 | 5.7±0.5 | 9.3±0.0 | 0.0±1.4 | -1.5±0.0 | 2.6 | 2.9 | 2.0±0.2 |

**Supplementary Table 6.** Bulk and Amino acid nitrogen isotope ratios, ΣV values (‰), and trophic position in sinking particles collected at 2250 m.

| No. | Bulk | Trophic AAs | | | | | | Source AAs | | THAA | ΣV | TP |
| --- | --- | --- | --- | --- | --- | --- | --- | --- | --- | --- | --- | --- |
| Ala | Val | Leu | Ile | Pro | Glu | Gly | Phe |
| 1 | 0.8 | 10.5±1.0 | 14.0±1.7 | 6.1±0.6 | 9.5±0.8 | 11.9±0.7 | 15.0±0.6 | 3.5±0.7 | 4.3±0.1 | 6.1 | 2.5 | 2.0±0.2 |
| 2 | 1.7 | 8.5±0.0 | 11.6±0.9 | 5.1±0.8 | 7.1±0.9 | 11.8±0.9 | 12.2±1.0 | 2.4±0.1 | 4.0±1.0 | 5.4 | 2.5 | 1.6±0.2 |
| 3 | 1.5 | 8.1±0.9 | 11.0±1.0 | 4.3±0.7 | 6.5±1.1 | 11.2±0.0 | 11.7±0.3 | 2.6±0.2 | 2.5±0.5 | 4.8 | 2.5 | 1.8±0.2 |
| 4 | 3.7 | 9.1±1.4 | 13.3±1.6 | 5.9±0.0 | 5.9±0.5 | 13.0±0.6 | 13.2±0.6 | 2.6±0.3 | 4.8±0.6 | 5.7 | 3.1 | 1.7±0.2 |
| 5 | 3.8 | 8.8±0.4 | 11.4±0.6 | 5.1±0.6 | 7.0±0.6 | 11.8±0.6 | 12.3±0.3 | 1.8±0.1 | 3.1±0.4 | 5.7 | 2.4 | 1.8±0.2 |
| 6 | 2.1 | 11.5±0.9 | 14.8±0.6 | 11.7±0.4 | 12.2±0.4 | 8.4±0.8 | 15.9±0.8 | 4.4±1.2 | 5.4±0.9 | 5.9 | 2.0 | 1.9±0.3 |
| 7 | 3.2 | 8.9±0.2 | 12.5±0.5 | 5.7±0.0 | 7.8±0.3 | 11.7±0.0 | 11.6±0.1 | 2.5±0.2 | 2.2±0.8 | 5.0 | 2.3 | 1.8±0.2 |
| 8 | 2.0 | 8.8±0.8 | 12.4±1.5 | 6.3±0.2 | 8.2±0.4 | 10.6±0.5 | 12.1±0.7 | 2.7±0.2 | 3.5±0.6 | 5.5 | 2.0 | 1.7±0.2 |
| 9 | 2.0 | 8.2±1.1 | 11.0±1.1 | 2.8±0.1 | 2.0±0.8 | 11.6±0.0 | 10.5±1.0 | 0.9±1.7 | 1.0±0.0 | 4.0 | 3.5 | 1.8±0.2 |
| 10 | 1.8 | 7.9±0.2 | 11.9±0.8 | 2.4±0.7 | 5.6±0.5 | 9.4±0.9 | 11.1±1.2 | 1.0±0.3 | -0.1±1.1 | 4.1 | 2.7 | 2.0±0.3 |
| 11 | 3.1 | 9.8±1.4 | 9.7±0.6 | 6.6±0.7 | 6.1±0.1 | 14.9±0.4 | 13.6±1.6 | 2.7±0.2 | 0.6±0.1 | 5.3 | 2.7 | 2.3±0.3 |
| 12 | 3.9 | 8.6±0.6 | 9.4±0.5 | 5.7±0.7 | 4.6±0.7 | 9.1±0.5 | 8.7±0.5 | 0.6±0.9 | 0.8±0.9 | 3.8 | 1.7 | 1.6±0.2 |
| 13 | 1.1 |  |  |  |  |  |  |  |  |  |  |  |
| 14 | -0.8 | 3.4±0.8 | 10.0±0.5 | 5.1±0.7 | 8.3±0.6 | 9.3±0.5 | 13.8±0.3 | -1.0±1.0 | -1.8±1.0 | 3.7 | 2.7 | 2.6±0.3 |
| 15 | -0.2 | 4.9±0.6 | 14.4±0.2 | 1.9±0.8 | 4.5±0.6 | 8.5±0.3 | 7.0±0.4 | -1.8±1.1 | -1.2±1.1 | 2.7 | 3.1 | 1.6±0.2 |
| 16 | -1.7 |  |  |  |  |  |  |  |  |  |  |  |
| 17 | 0.4 | 2.0±0.8 | 8.1±0.3 | 0.7±0.9 | 0.3±0.1 | 7.7±0.4 | 7.4±0.4 | -0.6±1.0 | -1.7±1.1 | 2.2 | 3.4 | 1.7±0.2 |
